# Supplementary material for: Hallucinations after Cardiac Surgery: A Prospective Observational Study
Source: MDPI journal article supplement (doi:10.3390/medicina56030104), 2020-03-02
Supplement: s1 [file s1]

Supplemental Material:

**Table S1.** Characteristics of visual and auditory hallucinations in the cardiac surgery group (n=201).

|                                                                   | <b>Visual Hallucinations<br/>(N = 39)</b> | <b>Auditory Hallucinations<br/>(N = 9)</b> |
|-------------------------------------------------------------------|-------------------------------------------|--------------------------------------------|
| <b>Duration</b>                                                   |                                           |                                            |
| Very brief, just an instant                                       | 4 (10.3)                                  | 4 (44.4)                                   |
| A few seconds                                                     | 8 (20.5)                                  | 0                                          |
| A minute or a few minutes                                         | 11 (28.2)                                 | 1 (11.1)                                   |
| 10 minutes to an hour                                             | 4 (10.3)                                  | 1 (11.1)                                   |
| Between one and several hours                                     | 6 (15.4)                                  | 2 (22.2)                                   |
| (Almost) continually                                              | 5 (12.8)                                  | 0                                          |
| Unknown                                                           | 1 (2.6)                                   | 1 (11.1)                                   |
| <b>Time of occurrence</b>                                         |                                           |                                            |
| No time pattern noticed                                           | 6 (15.4)                                  | 0                                          |
| Only at night                                                     | 9 (23.1)                                  | 4 (44.4)                                   |
| Mostly during the evening                                         | 3 (7.7)                                   | 0                                          |
| At the borders of sleep                                           | 5 (12.8)                                  | 1 (11.1)                                   |
| Mostly during the day                                             | 8 (20.5)                                  | 1 (11.1)                                   |
| Both during the day and night                                     | 5 (12.8)                                  | 1 (11.1)                                   |
| Unknown                                                           | 3 (7.7)                                   | 0                                          |
| <b>Emotional valence</b>                                          |                                           |                                            |
| Never negative; the entire content is positive, useful or neutral | 32 (82.1)                                 | 7 (77.8)                                   |
| Occasional instances of negative content (< 10%)                  | 2 (5.1)                                   | 1 (11.1)                                   |
| Some of the content is negative                                   | 1 (2.6)                                   | 0                                          |
| About half of the content is negative                             | 0                                         | 0                                          |
| The majority of the content is negative                           | 1 (2.6)                                   | 0                                          |
| Always, the entire content is negative                            | 3 (7.7)                                   | 1 (11.1)                                   |
| <b>Experienced distress</b>                                       |                                           |                                            |
| No discomfort, it does not affect me at all                       | 30 (76.9)                                 | 8 (88.9)                                   |
| Doubtful, perhaps a little discomfort                             | 1 (2.6)                                   | 0                                          |
| Some discomfort, it may affect my behavior or mood                | 3 (7.7)                                   | 0                                          |

|                                                                           |           |          |
|---------------------------------------------------------------------------|-----------|----------|
| Considerable discomfort, making me feel anxious, restless or depressed    | 1 (2.6)   | 0        |
| A lot of discomfort, making me feel afraid, unsafe or depressed           | 3 (7.7)   | 1 (11.1) |
| Unknown                                                                   | 1 (2.6)   | 0        |
| <b>Insight</b>                                                            |           |          |
| Completely convinced that the hallucinations are not real                 | 30 (76.9) |          |
| Slight doubt whether they are real, most likely not real                  | 1 (2.6)   |          |
| They are probably real, but alternative explanations may also be possible | 1 (2.6)   |          |
| Strongly convinced that the hallucinations are real, only a little doubt  | 2 (5.1)   |          |
| Completely convinced that the hallucinations are real                     | 4 (10.3)  |          |
| Unknown                                                                   | 1 (2.6)   |          |
| <b>Complexity (visual)</b>                                                |           |          |
| Simple forms like circles, flashes of light, dots or lines                | 9 (23.1)  |          |
| Patterns, i.e. checkerboards, diamond shaped objects, lattices or bricks  | 5 (12.8)  |          |
| (Distorted) faces or shadows                                              | 8 (20.5)  |          |
| Complex images: people and/or animals                                     | 5 (12.8)  |          |
| Complex images: inanimate objects (e.g. buildings, vehicles)              | 11 (28.2) |          |
| Unknown                                                                   | 1 (2.6)   |          |
| <b>Complexity (auditory)</b>                                              |           |          |
| Only non-verbal auditory hallucinations, no voices                        |           | 2 (22.2) |
| One single word                                                           |           | 1 (11.1) |
| Several words, short phrases                                              |           | 0        |
| Single sentences                                                          |           | 3 (33.3) |
| Several sentences running together                                        |           | 2 (22.2) |
| Unknown                                                                   |           | 1 (11.1) |

All values presented as N (%).

**Table S2.** Univariable logistic regression coefficients of potential risk factors for developing postoperative hallucinations (n=201).

|                                                        | Patients without Hallucinations N = 157 | Patients with Hallucinations N = 44 | Bèta   | OR    | Confidence Interval | P-value      |
|--------------------------------------------------------|-----------------------------------------|-------------------------------------|--------|-------|---------------------|--------------|
| Age, years, median (IQR)                               | 64 (57 to 72)                           | 69 (62 to 78)                       | 0.047  | 1.048 | 1.01 to 1.09        | <b>0.009</b> |
| Male sex (male=0)                                      | 113 (72)                                | 33 (75)                             | -1.155 | 0.856 | 0.40 to 1.84        | 0.691        |
| Diabetes managed with insulin                          | 15 (9.6)                                | 1 (2.3)                             | -0.513 | 0.22  | 0.03 to 1.72        | 0.148        |
| Presence of coronary artery disease                    | 100 (63.7)                              | 29 (65.9)                           | 0.097  | 1.102 | 0.55 to 2.23        | 0.787        |
| Presence of valvular disease                           | 91 (58)                                 | 25 (56.8)                           | -0.047 | 0.954 | 0.49 to 1.88        | 0.892        |
| Presence of extracardiac arteriopathy                  | 15 (9.6)                                | 3 (6.8)                             | -0.367 | 0.693 | 0.19 to 2.51        | 0.576        |
| History of cardiac surgery                             | 12 (7.6)                                | 1 (2.3)                             | -1.269 | 0.281 | 0.04 to 2.22        | 0.229        |
| Chronic lung disease                                   | 14 (8.9)                                | 5 (11.4)                            | 0.270  | 1.31  | 0.44 to 3.86        | 0.625        |
| Benzodiazepine pre-medication                          | 135 (86)                                | 29 (65.9)                           | -1.155 | 0.315 | 0.15 to 0.68        | <b>0.003</b> |
| Duration of cardiopulmonary bypass, minutes, mean (SD) | 115 (54)                                | 133 (78)                            | 0.005  | 1.005 | 1.00 to 1.01        | <b>0.075</b> |

|                                                                                         |           |           |                |       |                     |              |
|-----------------------------------------------------------------------------------------|-----------|-----------|----------------|-------|---------------------|--------------|
| Postoperative transfusion of blood products                                             | 42 (26.8) | 19 (43.2) | 0.733          | 2.081 | 1.04 to 4.16        | <b>0.038</b> |
| Cumulative postoperative benzodiazepine dose, IV midazolam equivalent (mg), median, IQR | 3 (0-10)  | 6 (0-14)  | -0.002         | 0.998 | 0.99 to 1.01        | 0.773        |
| Cumulative postoperative opioid dose, IV morphine equivalent (mg), median, IQR          | 12 (5-26) | 18 (6-32) | 0.007          | 1.007 | 0.99 to 1.02        | 0.371        |
| Postoperative delirium                                                                  | 16 (10.2) | 10 (22.7) | 0.952          | 2.592 | 1.08 to 6.21        | <b>0.033</b> |
|                                                                                         |           |           | Wald statistic | OR    | Confidence interval | P-value      |
| Renal impairment                                                                        |           |           |                |       |                     |              |
| No (GFR > 85)*                                                                          | 92 (58.6) | 23 (52.3) | 0.766          |       |                     | 0.682        |
| Moderate (GFR 51-85)                                                                    | 53 (33.8) | 18 (40.9) | 0.729          | 1.358 | 0.67 to 2.75        | 0.393        |
| Severe (GFR <50) or on dialysis                                                         | 12 (7.6)  | 3 (6.8)   | 0              | 1     | 0.26 to 3.84        | 1            |
| Symptom severity<br>NYHA / CCS- class                                                   |           |           |                |       |                     |              |
| I*                                                                                      | 38 (24.2) | 4 (9.1)   | 5.667          |       |                     | 0.129        |

|                                    |           |           |       |       |               |       |
|------------------------------------|-----------|-----------|-------|-------|---------------|-------|
| II                                 | 66 (42)   | 24 (54.5) | 4.613 | 3.455 | 1.12 to 10.71 | 0.032 |
| III                                | 36 (22.9) | 13 (29.5) | 3.988 | 3.431 | 1.02 to 11.51 | 0.046 |
| IV                                 | 17 (10.8) | 3 (6.8)   | 0.399 | 1.676 | 0.34 to 8.32  | 0.527 |
| Left ventricular ejection fraction |           |           |       |       |               |       |
| Good (>50%)*                       | 98 (62.4) | 27 (61.4) | 0.461 |       |               | 0.794 |
| Moderate (31-50%)                  | 44 (28)   | 14 (31.8) | 0.147 | 1.155 | 0.55 to 2.41  | 0.702 |
| Poor (<30%)                        | 15 (9.6)  | 3 (6.8)   | 0.229 | 0.726 | 0.20 to 2.69  | 0.632 |

Values represent n (%), unless indicated otherwise. \* reference category.
